# Supplementary material
Source: publisher figshare collection journal article supplement (https://rs.figshare.com/ndownloader/files/13440050)
Supplement: Supplementary file 1 [file 13440050]

**Table S1** Full names of mangrove reserves involved in the study.

| Full names of reserves | Codes of reserves in the manuscript |
| --- | --- |
| Hainan Dongzhai Harbour National Nature Reserve | Dongzhai Bay |
| Hainan Qinglan Harbour Provincial Nature Reserve | Qinglan Bay |
| Hainan Danzhou Xinying Harbour Mangrove Nature Reserve | Danzhou |
| Hainan Danzhou Dongchang Mangrove Nature Reserve  Hainan Lingao Caiqiao Mangrove Nature Reserve | Dongchang-Caiqiao |
| Hainan Dongfang Provincial Nature Reserve | Dongfang |
| Hainan Sanya River Mangrove Nature Reserve;  Hainan Sanya Qingmei Harbour Mangrove Nature Reserve; Hainan Sanya Tielu Harbour Mangrove Nature Reserve | Sanya |
| Hainan Chengmai Huachang Bay Mangrove Nature Reserve | Chengmai |
